# Supplementary material
Source: publisher site journal article supplement (https://zookeys.pensoft.net/article/57047/download/suppl/31/)

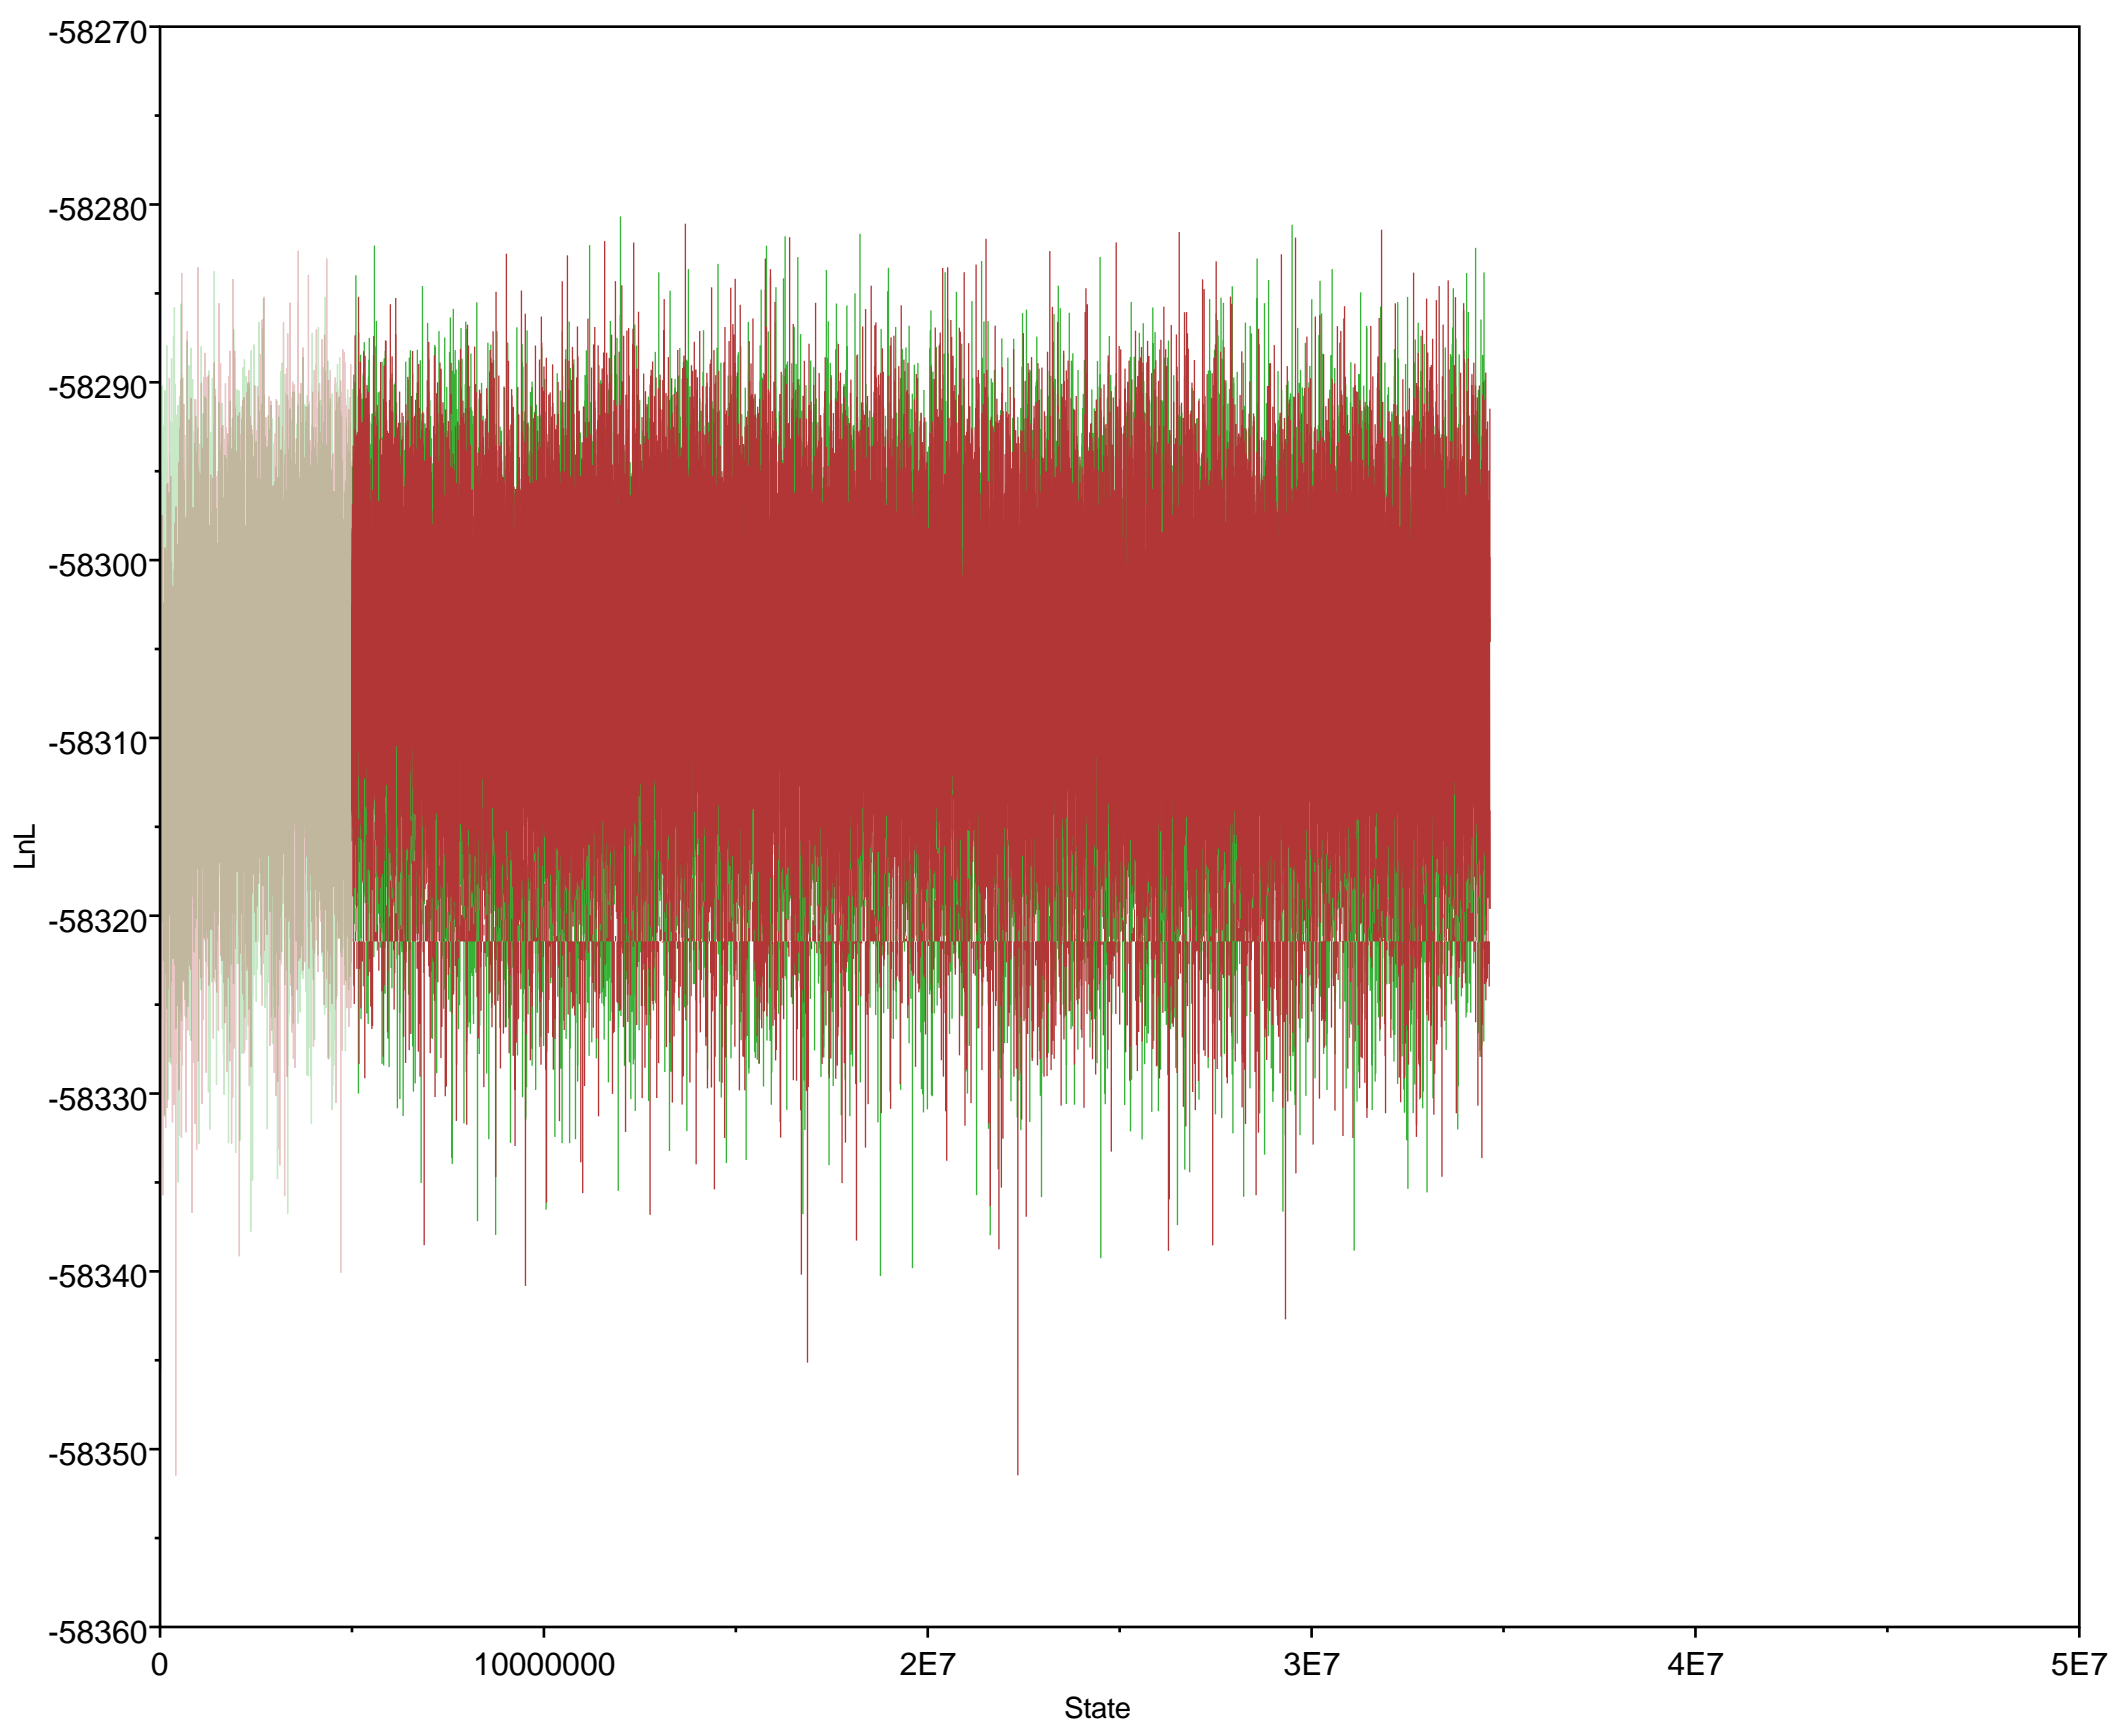

Supplement: Supplementary file 1

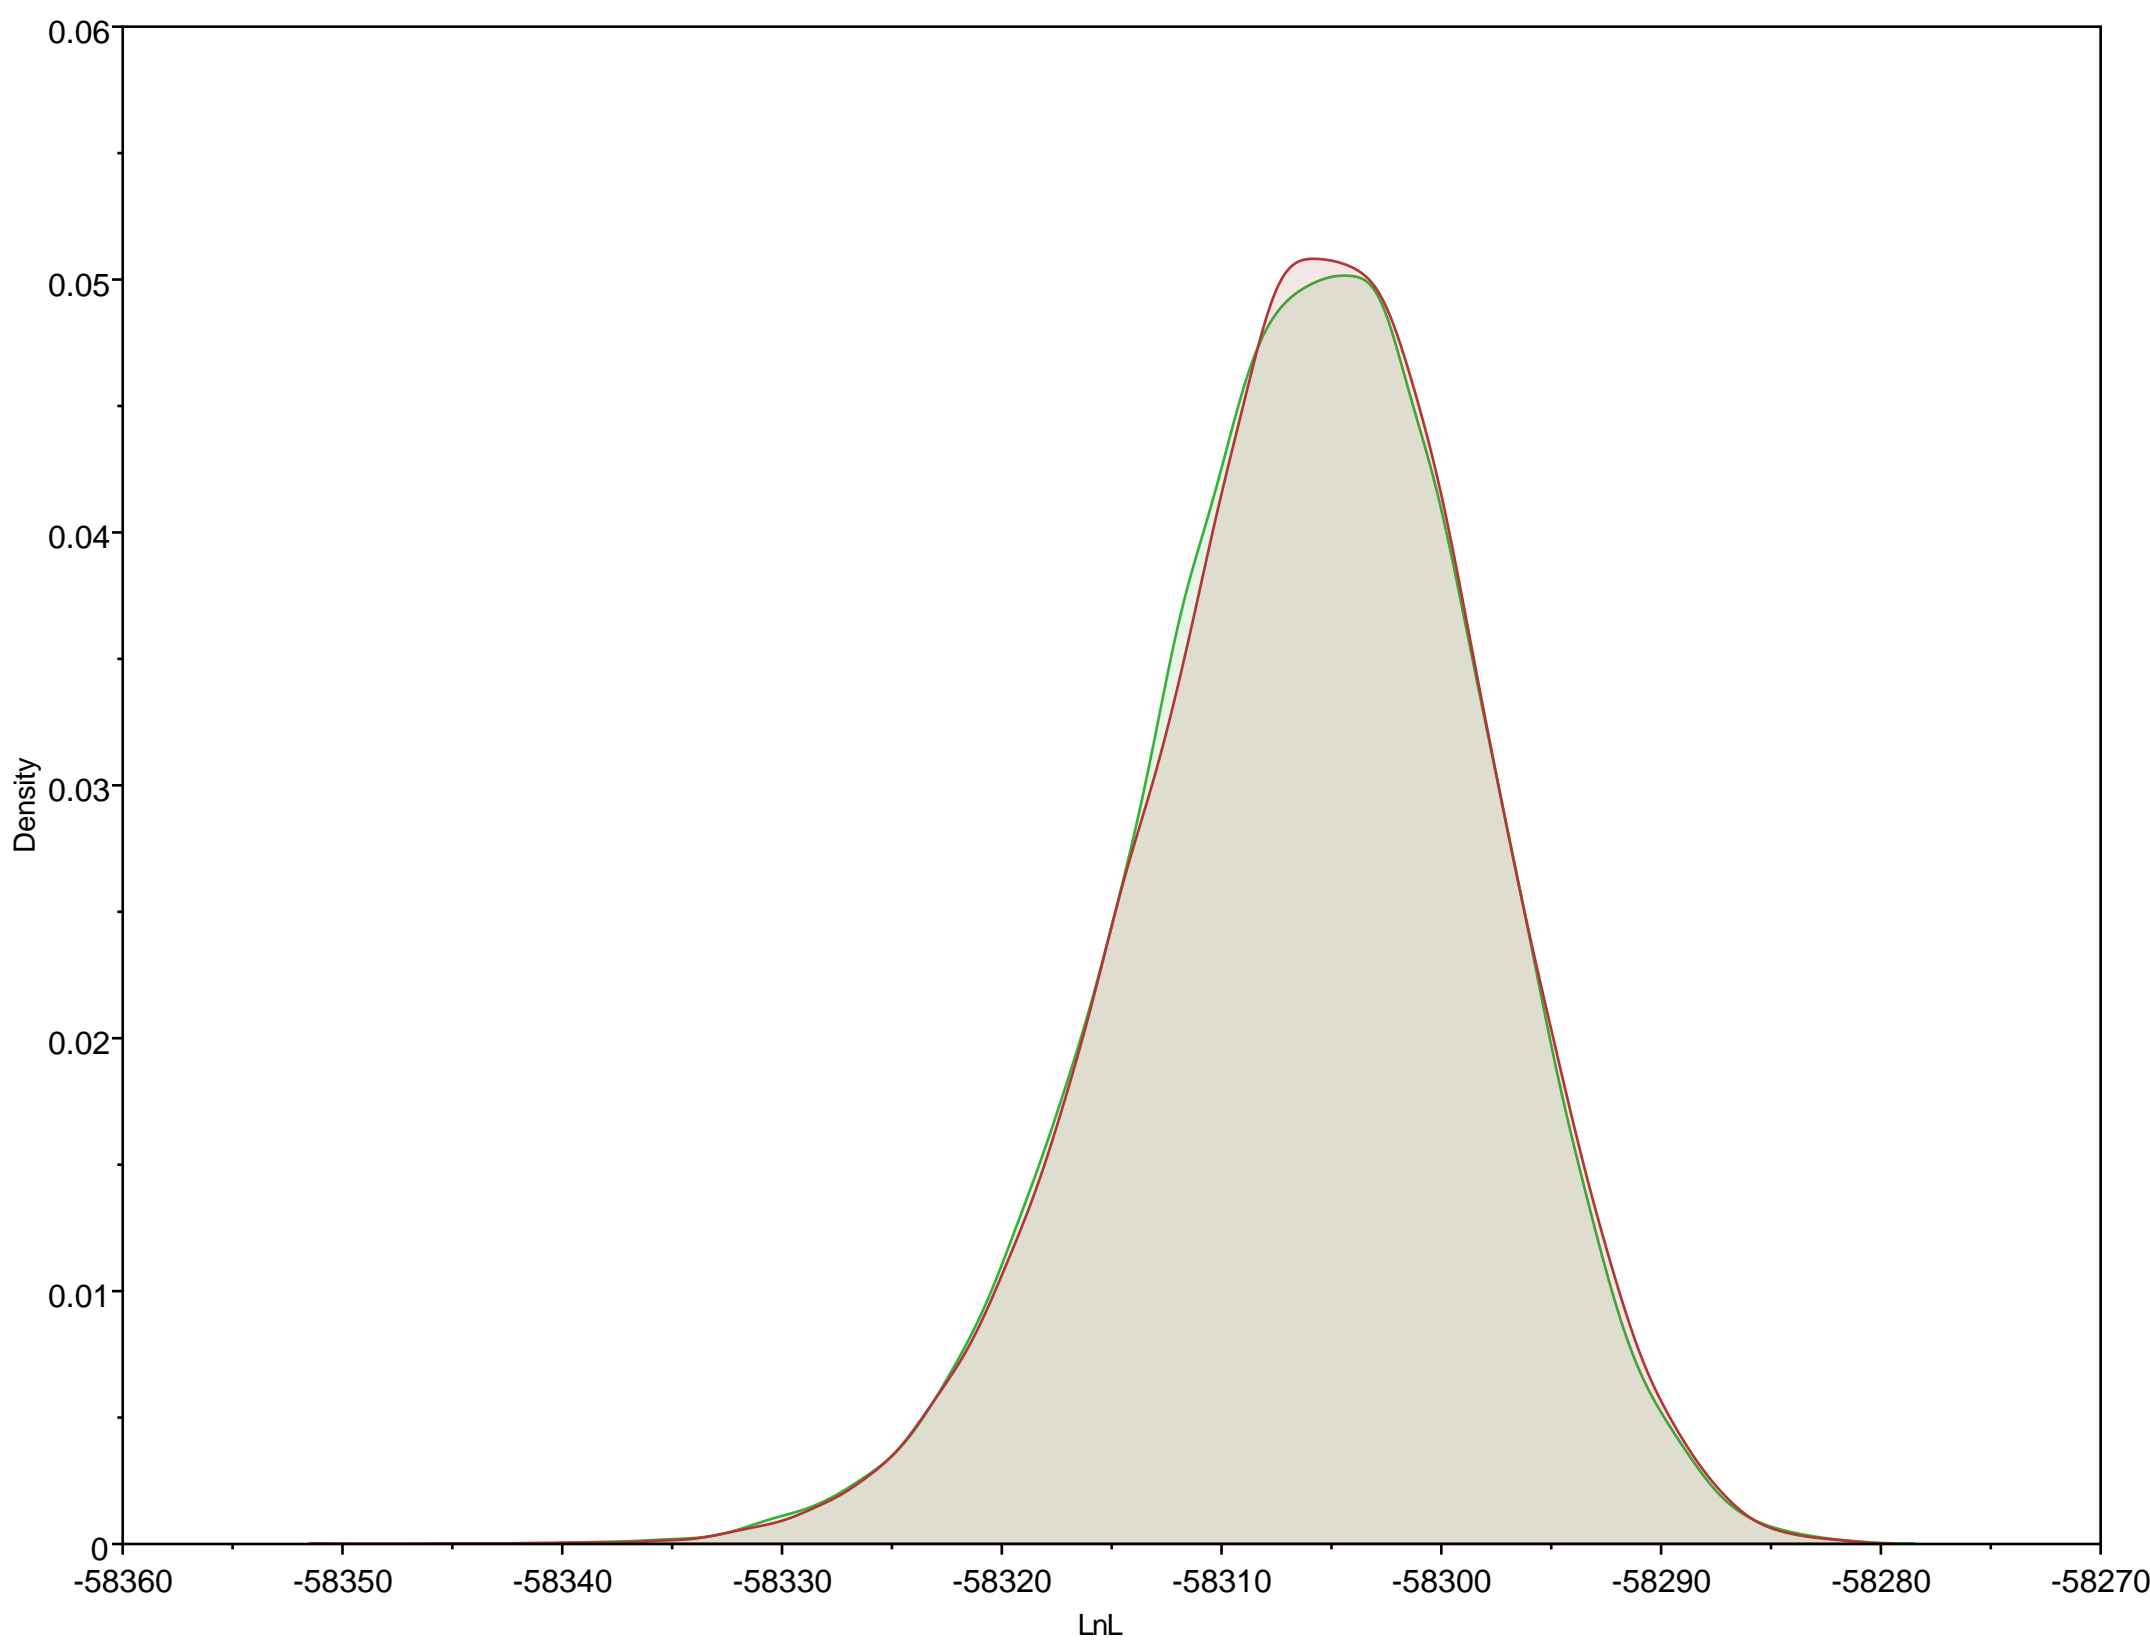

Supplement: Supplementary file 2
